# Supplementary material for: Interval-Based Dynamic Discretization Discovery for Solving the Continuous-Time Service Network Design Problem
Source: Atypon-hosted journal article supplement (doi:10.1287/trsc.2020.0994), 2020-10-14
Supplement: trsc.2020.0994.sm1.pdf [file trsc.2020.0994.sm1.pdf]

## Appendix. Proofs

*Proof of PROPOSITION 1.* From known results (Ahuja, Magnanti, and Orlin 1993, 103-104) the inequalities (4) are feasible, if and only if the constraint graph  $\widehat{GS}(S)$  does not have a positive length cycle. By definition, the flat-solution  $S$  is implementable if and only if (3) is feasible. Hence it is sufficient to show that the inequalities (3) are equivalent to (4).

Observe that (4) is simply (3) shifted by  $D$ : for (3)  $\Rightarrow$  (4) simply take  $D = D' = 0$ . For (3)  $\Leftarrow$  (4), let  $\{(\hat{t}_n^k), D, D'\}$  be a solution of (4), and let  $t_n^k = \hat{t}_n^k - D$ . Then clearly  $(t_n^k)$  satisfies (3), and the only constraint that does not follow immediately is given by

$$\begin{aligned} \hat{t}_{d^k}^k - D' &\leq l^k \\ t_{d^k}^k + D - D' &\leq l^k \\ t_{d^k}^k &\leq l^k + D' - D, \end{aligned}$$

and  $D' - D \leq 0$  implies  $t_{d^k}^k \leq l^k$ . □

We next prove the following useful lemma:

LEMMA 5. *For any  $\alpha \in \mathcal{T}^n$  and  $(n, t, t') \in \mathcal{N}_{\mathcal{T}}$ , if  $\alpha < t'$  then  $\alpha \leq t$ .*

*Proof.* Let  $i, j \in \mathbb{Z}$  be such that  $\alpha$  is the  $i$ th time point in  $\mathcal{T}^n$  and  $t'$  is the  $j$ th, where  $\mathcal{T}^n$  is ordered from smallest to largest time. Then  $t$  is the  $(j-1)$ th time point in  $\mathcal{T}^n$  by construction of  $\mathcal{N}_{\mathcal{T}}$ . Thus  $\alpha < t'$  implies  $i < j$ , and thus  $i \leq j-1$ . Hence  $\alpha \leq t$ . □

*Proof of LEMMA 4.* Consider the induction hypothesis

$$H(i): \quad t_i \geq e^k + \tau\left(\widehat{P}^{\rightarrow(n_i, t_i, t'_i)}\right), \quad \text{for some } i = 1, \dots, r-1.$$

It is true by assumption for  $i = 1$ , and since  $\tau(\widehat{P}^{\rightarrow(n_1, t_1, t'_1)}) = 0$ . Suppose that  $H(i)$  is true for some  $i \in \{1, \dots, r-1\}$ . Recall that  $\mathcal{A}_{\mathcal{T}}^K = \bigcup_{k \in K} \mathcal{A}_{\mathcal{T}}^k$ , then observe that there exists  $k' \in K$  such that  $((n_i, t_i, t'_i), (n_{i+1}, t_{i+1}, t'_{i+1})) \in \mathcal{A}_{\mathcal{T}}^{k'}$ , so by [5] on  $\mathcal{A}_{\mathcal{T}}^{k'}$

$$\begin{aligned} t'_{i+1} &> t_i + \tau_{(n_i, n_{i+1})} \\ &\geq e^k + \tau(\widehat{P}^{\rightarrow(n_i, t_i, t'_i)}) + \tau_{(n_i, n_{i+1})} \\ &= e^k + \tau(\widehat{P}^{\rightarrow(n_{i+1}, t_{i+1}, t'_{i+1})}) \end{aligned}$$

By the above lemma, and since  $(n_{i+1}, e^k + \tau(\widehat{P}^{\rightarrow(n_{i+1}, t_{i+1}, t'_{i+1})})) \in \mathcal{T}$  it follows that

$$t_{i+1} \geq e^k + \tau(\widehat{P}^{\rightarrow(n_{i+1}, t_{i+1}, t'_{i+1})}),$$

and  $H(i)$  holds. □

*Proof of THEOREM 1.* First observe that since the flat-solution  $S$  is non-implementable and the solution graph  $GS(S)$  is acyclic, the path  $P$ , defined in the theorem, exists. Specifically, from LEMMA 2 there exists a simple path,  $P$ , in  $GS(S)$ , from  $t_{o^{k_1}}^{k_1}$  to  $t_{d^{k_2}}^{k_2}$  for some  $k_1, k_2 \in K$ , such that  $e^{k_1} + \rho(P) > l^{k_2}$ . Moreover, this path can always be chosen without any holding time, that is, for all  $t_n^k$  in  $P$ :  $E_{t_n^k} = e^{k_1} + \rho(P \rightarrow t_n^k)$ . To see this, walk up the graph from  $t_{d^{k_2}}^{k_2}$  following the  $\arg \max_{k \in K} E_{t_n^k}$  commodity at each consolidation.

Suppose that  $S$  is representable in  $\mathcal{G}_{\mathcal{T}'}^K$ , then from Observation 1 there exists the simple path  $\widehat{P}$  in  $(\mathcal{N}_{\mathcal{T}'}, \mathcal{A}_{\mathcal{T}'}^K)$  that corresponds to  $P$ , in particular having

$$a = ((n_{|\widehat{P}|-1}, t_{|\widehat{P}|-1}, t'_{|\widehat{P}|-1}), (d^{k_2}, t_{|\widehat{P}|}, t'_{|\widehat{P}|})) \in \mathcal{A}_{\mathcal{T}'}^{k_2},$$

and with

$$\tau(\widehat{P}^{-i}) = \rho(P \rightarrow t_n^k),$$

for all  $i = (n, t, t')$ , the node-interval corresponding with a visit to  $t_n^k$ . Observe that the path  $P$  may visit the node  $n \in N$  with multiple commodities at different times, but a single commodity will visit  $n$  at most once. Clearly then  $i$  has a unique correspondence to  $t_n^k$ , and hence

$$E_{t_n^k} = e^{k_1} + \tau(P^{-i}).$$

Thus by LEMMA 4 on  $\widehat{P}$ ,

$$t_{|\widehat{P}|} \geq e^{k_1} + \tau(\widehat{P}) = e^{k_1} + \rho(P) > l^{k_2},$$

but this violates [4] on  $\mathcal{A}_{\mathcal{T}'}^{k_2}$ . Thus  $a \notin \mathcal{A}_{\mathcal{T}'}^{k_2}$ , and there does not exist path  $\widehat{P}$  corresponding to  $P$ , hence by Observation 2,  $S$  is not representable in  $\mathcal{G}_{\mathcal{T}'}^K$ .  $\square$

*Proof of THEOREM 2.* Suppose that  $S$  is representable in  $\mathcal{G}_{\mathcal{T}'}^K$ , then by Observation 1 there exists a timed-path in  $\mathcal{G}_{\mathcal{T}'}^k$ , corresponding to the flat-path  $Q^k$ ; more specifically, there exist timed-arcs

$$((n_1, t_1, t'_1), (n_2, t_2, t'_2)), ((n_2, \hat{t}_2, \hat{t}'_2), (n_3, t_3, t'_3)) \in \mathcal{A}_{\mathcal{T}'}^k,$$

with  $t_2 \leq \hat{t}_2$ . Then using LEMMA 5, with  $(n_2, e^k + \gamma(o^k, n_1) + \tau_{(n_1, n_2)}) \in \mathcal{T}'$ , and [3] on  $\mathcal{A}_{\mathcal{T}'}^k$ , implies

$$e^k + \gamma(o^k, n_1) + \tau_{(n_1, n_2)} \leq t_2,$$

and [4] on  $\mathcal{A}_{\mathcal{T}'}^k$ , requires

$$\hat{t}_2 + \tau_{(n_2, n_3)} + \gamma(n_3, d^k) \leq l^k,$$

but this implies

$$e^k + \gamma(o^k, n_1) + \tau_{(n_1, n_2)} + \tau_{(n_2, n_3)} + \gamma(n_3, d^k) \leq l^k.$$

This contradicts the assumption, so at least one of the above timed-arcs cannot exist. Thus the timed-path cannot exist, and by Observation 2,  $S$  is not representable in  $\mathcal{G}_{\mathcal{T}'}^K$ .  $\square$

*Proof of THEOREM 3.* Suppose that  $S$  is representable in  $\mathcal{G}_{\mathcal{T}'}^K$ , then by Observation 1 there exists timed-paths in  $\mathcal{G}_{\mathcal{T}'}^K$ , corresponding to  $Q^{k_1}$ , and  $Q^{k_2}$ ; more specifically, there exist timed-arc  $a = ((n_1, t_1, t'_1), (n_2, t_2, t'_2))$ , such that  $a \in \mathcal{A}_{\mathcal{T}'}^{k_1}$ , and  $a \in \mathcal{A}_{\mathcal{T}'}^{k_2}$ . Observe that [4] on  $\mathcal{A}_{\mathcal{T}'}^{k_2}$ , requires

$$t_2 + \gamma(n_2, d^{k_2}) \leq l^{k_2},$$

and [3] on  $\mathcal{A}_{\mathcal{T}'}^{k_1}$ , requires

$$e^{k_1} + \gamma(o^{k_1}, n_1) + \tau_{(n_1, n_2)} < t'_2.$$

By assumption  $(n_2, e^{k_1} + \gamma(o^{k_1}, n_1) + \tau_{(n_1, n_2)}) \in \mathcal{T}'$ , so LEMMA 5 gives

$$e^{k_1} + \gamma(o^{k_1}, n_1) + \tau_{(n_1, n_2)} \leq t_2,$$

but this implies that

$$e^{k_1} + \gamma(o^{k_1}, n_1) + \tau_{(n_1, n_2)} + \gamma(n_2, d^{k_2}) \leq l^{k_2}.$$

Since this contradicts assumptions, then  $a \notin \mathcal{A}_{\mathcal{T}'}^{k_1}$ , or  $a \notin \mathcal{A}_{\mathcal{T}'}^{k_2}$ , and hence the timed-path cannot exist, and by Observation 2,  $S$  is not a representable solution in  $\mathcal{G}_{\mathcal{T}'}^K$ .  $\square$

*Proof of THEOREM 4.* Suppose  $S$  is representable in  $\mathcal{G}_{\mathcal{T}'}^K$ , then from Observation 1 there exists the simple path  $\widehat{P}$  and simple cycle  $\overset{\circ}{P}$  in  $(\mathcal{N}_{\mathcal{T}'}, \mathcal{A}_{\mathcal{T}'}^K)$  that corresponds to  $P$  and  $\overset{\circ}{P}$  respectively. Specifically, there exists arcs

$$\begin{aligned} ((n_{j-1}, t_{j-1}, t'_{j-1}), (n'_j, t_j, t'_j)) &= \widehat{P}_{(j)} \in \mathcal{A}_{\mathcal{T}'}^{k_1}, \text{ for } j = 1, \dots, |\widehat{P}|, \text{ and} \\ ((n_{|\widehat{P}|+j'}, t_{|\widehat{P}|+j'}, t'_{|\widehat{P}|+j'}), (n'_{|\widehat{P}|+j'+1}, t_{|\widehat{P}|+j'+1}, t'_{|\widehat{P}|+j'+1})) &= \overset{\circ}{P}_{(j'+1)} \in \mathcal{A}_{\mathcal{T}'}^K, \text{ for } j' = 0, \dots, |\overset{\circ}{P}|, \end{aligned}$$

such that

$$(n_{|\widehat{P}|}, t_{|\widehat{P}|}, t'_{|\widehat{P}|}) = (n'_{|\widehat{P}|+\overset{\circ}{P}|+1}, t_{|\widehat{P}|+\overset{\circ}{P}|+1}, t'_{|\widehat{P}|+\overset{\circ}{P}|+1}), \text{ and } \overset{\circ}{P}_{(1)} \in \mathcal{A}_{\mathcal{T}'}^{k_1}.$$

Observe that  $\tau(\widehat{P} \rightarrow i) = \rho(P \rightarrow t_n^k)$  for all  $i = (n, t, t')$ , that is, the node-interval in  $\widehat{P}$  uniquely corresponding with a visit to  $t_n^k$ , so by LEMMA 4 on  $\widehat{P}$ :

$$t_{|\widehat{P}|} \geq e^{k_1} + \tau(\widehat{P}) = e^{k_1} + \rho(P).$$

Assume for a moment that  $\overset{\circ}{P}$  travels around the corresponding cycle  $\overset{\circ}{P}$  as early as possible, that is, without waiting at a node longer than necessary. Let  $r = |\overset{\circ}{P}|$ , let  $\eta_1, \eta_r \in N$  be the nodes visited by  $\overset{\circ}{P}_{(1)}$  and  $\overset{\circ}{P}_{(r)}$  respectively, and let  $i_r^0, i_1^1 \in \mathcal{N}_{\mathcal{T}'}$  be the node-interval corresponding to the first visit to  $\eta_r$ , and the first return to  $\eta_1$  in  $\overset{\circ}{P}$  respectively. Observe that joining  $P$  and  $\overset{\circ}{P} \rightarrow \overset{\circ}{P}_{(r)}$  yields a simple path, and so by LEMMA 4 on  $\widehat{P} \cup \overset{\circ}{P} \rightarrow i_r^0$ :

$$\begin{aligned} t_{|\widehat{P}|+\overset{\circ}{P} \rightarrow i_r^0} &\geq e^{k_1} + \tau(\widehat{P}) + \tau(\overset{\circ}{P} \rightarrow i_r^0) \\ &= e^{k_1} + \rho(P) + \rho(\overset{\circ}{P} \rightarrow \overset{\circ}{P}_{(r)}). \end{aligned}$$

Following from the proof in LEMMA 4, there exists  $k' \in K$  such that

$$((\eta_r, t_{s^1-1}, t'_{s^1-1}), (\eta_1, t_{s^1}, t'_{s^1})) \in \mathcal{A}_{\mathcal{T}'}^{k'} \cap \overset{\circ}{P},$$

with  $s^1 = |\widehat{P}| + |\widehat{P}^{\rightarrow i_1^1}|$ . By [5] on  $\mathcal{A}_{\mathcal{T}'}^{k'}$

$$\begin{aligned} t'_{s^1} &> t_{s^1-1} + \tau_{(\eta_r, \eta_1)} \\ &\geq e^{k_1} + \rho(P) + \rho(\widehat{P}^{\rightarrow \widehat{P}^{(r)}}) + \tau_{(\eta_r, \eta_1)} \\ &= e^{k_1} + \rho(P) + \rho(\widehat{P}). \end{aligned}$$

By LEMMA 5, and since  $(\eta_1, e^{k_1} + \rho(P) + \rho(\widehat{P})) \in \mathcal{T}'$  it follows that

$$t_{s^1} \geq e^{k_1} + \rho(P) + \rho(\widehat{P}).$$

Thus the first return to  $\eta_1$ ,  $\widehat{P} \cup \widehat{P}^{\rightarrow i_1^1}$ , is a simple path in  $(\mathcal{N}_{\mathcal{T}'}, \mathcal{A}_{\mathcal{T}'}^K)$ , i.e., not a cycle. Intuitively then, for  $m \leq \widehat{m}$  walks around the  $\widehat{P}$  cycle, the corresponding  $\widehat{P} \cup \widehat{P}^{\rightarrow i_1^m}$  is also a simple path in  $(\mathcal{N}_{\mathcal{T}'}, \mathcal{A}_{\mathcal{T}'}^K)$  with

$$\begin{aligned} t_{s^m} &\geq e^{k_1} + \tau(\widehat{P}) + \tau(\widehat{P}^{\rightarrow i_1^m}) \\ &= e^{k_1} + \rho(P) + m \rho(\widehat{P}), \end{aligned}$$

and  $s^m = |\widehat{P}| + |\widehat{P}^{\rightarrow i_1^m}|$ . Consider now that  $\widehat{P}$  can delay its walk around the corresponding  $\widehat{P}$  cycle by waiting, say, at time point  $(\eta, t) \in \mathcal{T}'$  with  $t \geq t_{|\widehat{P}|}$ . By definition of  $\mathcal{T}'$ , each delay is in increments of at most length  $\rho(\widehat{P})$  when  $t \leq e^{k_1} + \rho(P) + (\widehat{m} - 1)\rho(\widehat{P})$ , and a dispatch from  $\eta$  at time  $t + \rho(\widehat{P})$ , will arrive to the subsequent node  $\eta'$  at time  $t + \rho(\widehat{P}) + \tau_{(\eta, \eta')}$ , i.e., this time spent waiting is not lost. Delays of a size smaller than  $\rho(\widehat{P})$  indicate a more refined discretization and can be ignored. Thus we can interpret the  $m \leq \widehat{m}$  above as either walks around the  $\widehat{P}$  cycle, or delays at a node. In either case, the choice of  $\widehat{m}$  means that  $\widehat{P} \cup \widehat{P}^{\rightarrow i_1^{\widehat{m}}}$  is a simple path in  $(\mathcal{N}_{\mathcal{T}'}, \mathcal{A}_{\mathcal{T}'}^K)$ , and, for  $\widehat{P}$  to complete its cycle, it first requires a dispatch from  $n_{|\widehat{P}|}$  after  $t_{s^{\widehat{m}}}$ . It should be clear from [5] and LEMMA 5 that  $t_{|\widehat{P}|+|\widehat{P}|+1} \geq t_{s^{\widehat{m}}}$ . But  $t_{s^{\widehat{m}}} > l^{k_1}$  violates [4] on  $\mathcal{A}_{\mathcal{T}'}^{k_1}$ , thus  $\widehat{P}_{(1)} \notin \mathcal{A}_{\mathcal{T}'}^{k_1}$ , and so there exists no cycle  $\widehat{P}$  corresponding to  $\widehat{P}$ . Hence by Observation 2,  $S$  is not representable in  $\mathcal{G}_{\mathcal{T}'}^K$ .  $\square$

## References

Ahuja RK, Magnanti TL, Orlin JB, 1993 *Network Flows - Theory, Algorithms and Applications* (Englewood Cliffs, NJ: Prentice-Hall).
